# Supplementary material for: Chronoampermetric detection of enzymatic glucose sensor based on doped polyindole/MWCNT composites modified onto screen-printed carbon electrode as portable sensing device for diabetes
Source: Royal Society of Chemistry journal article supplement (doi:10.1039/d2ra04947c), 2022-01-01
Supplement: d2ra04947c1.pdf [file d2ra04947c1.pdf]

## Supplementary material

### Chronoampermetric Enzymatic Glucose Sensor Based on Doped Polyindole /Multi-walled Carbon Nanotube Composites Modified onto Screen-Printed Carbon Electrode as Portable Sensing Device for Diabetes

Katesara Phasuksom and Anuvat Sirivat\*

<sup>a</sup> Conductive and Electroactive Polymers Research Unit, The Petroleum and Petrochemical College, Chulalongkorn University, Bangkok, 10330, Thailand

<sup>b</sup> Center of Excellence on Petrochemical and Materials Technology, Bangkok, 10330, Thailand

\*Corresponding author. Tel.: +662 218 4131; Fax: +662 611 7221.

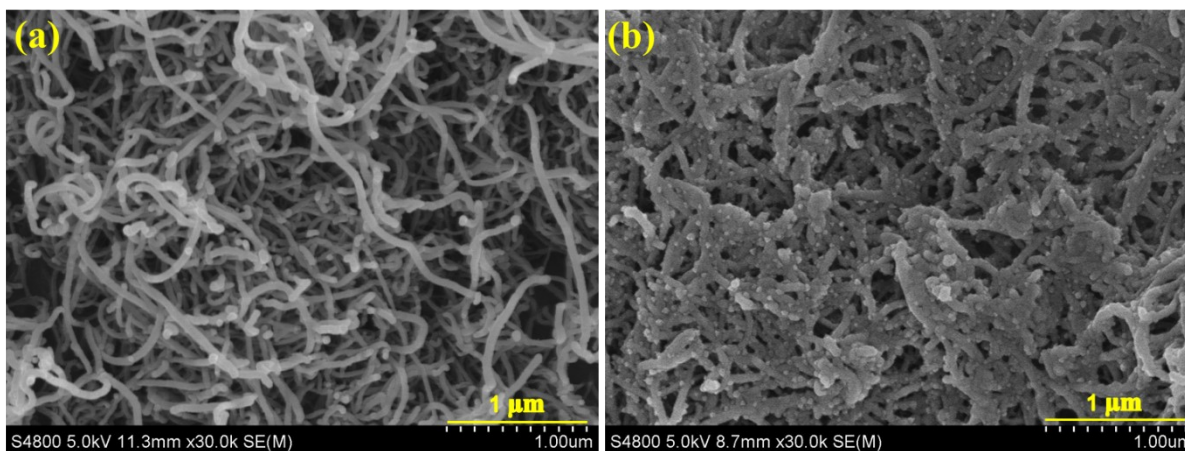

**Fig. S1** Surface morphologies at the 30,000x magnification of: (a) MWCNT; and (b) 1.5%MWCNT-dPIIn.

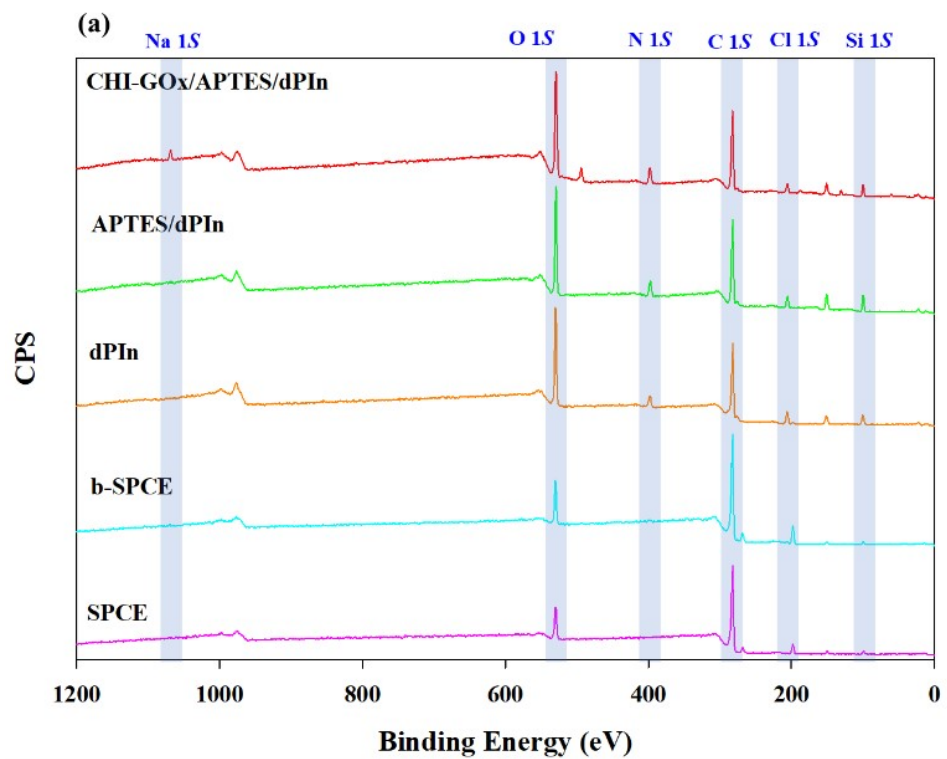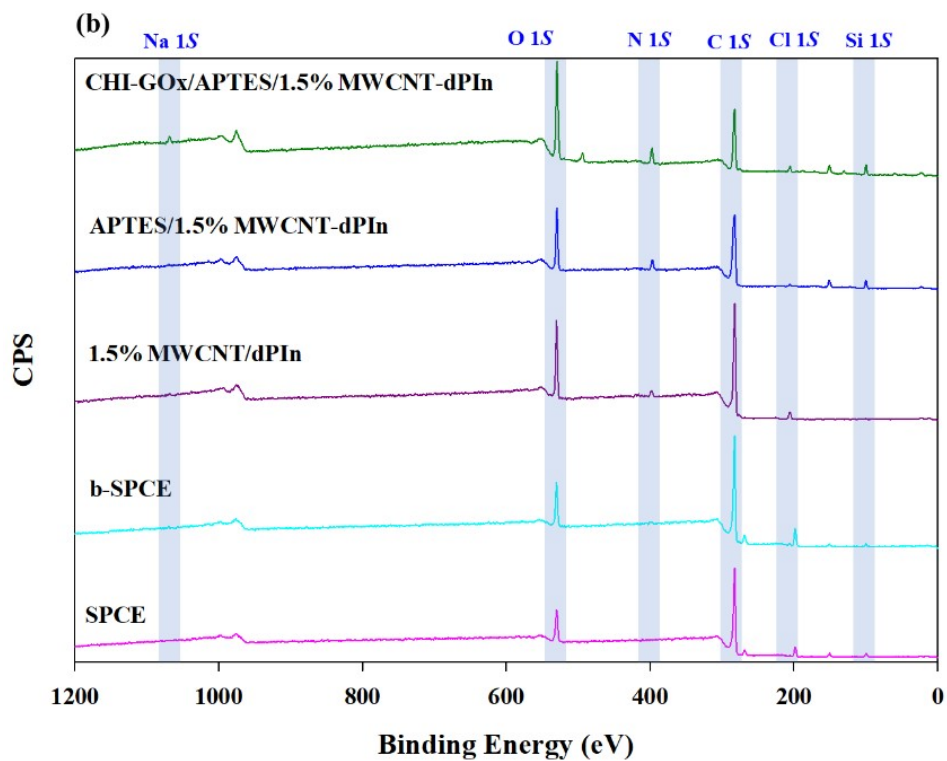

Fig. S2 Wide scan XPS spectra of various modified electrodes.

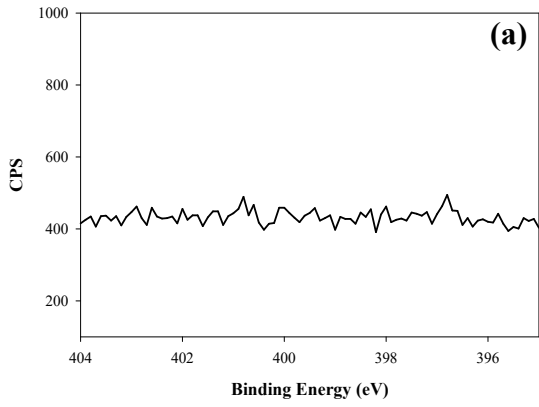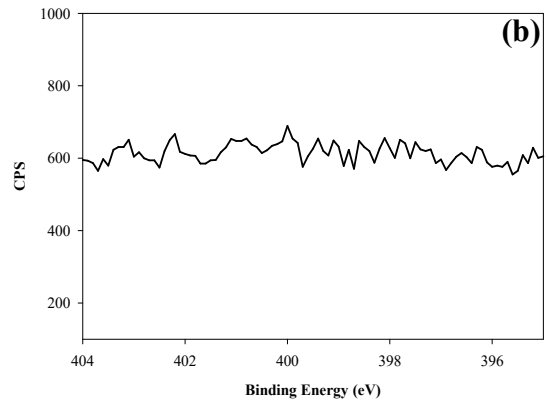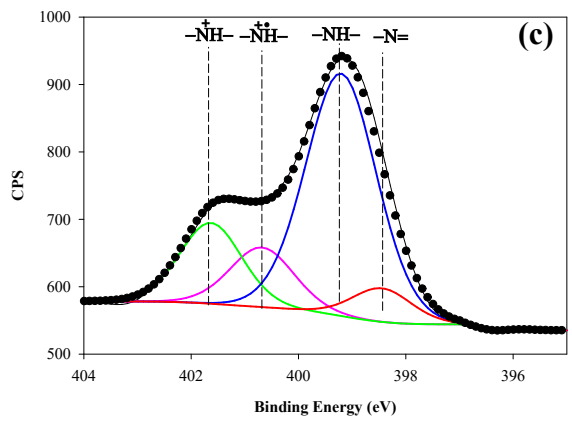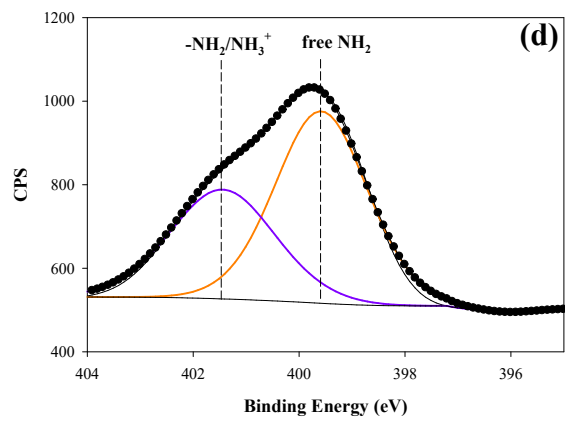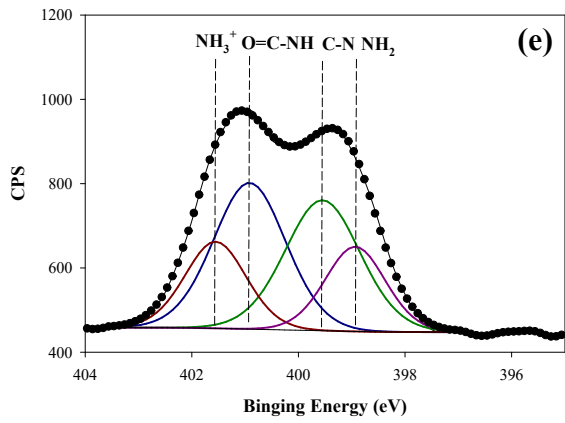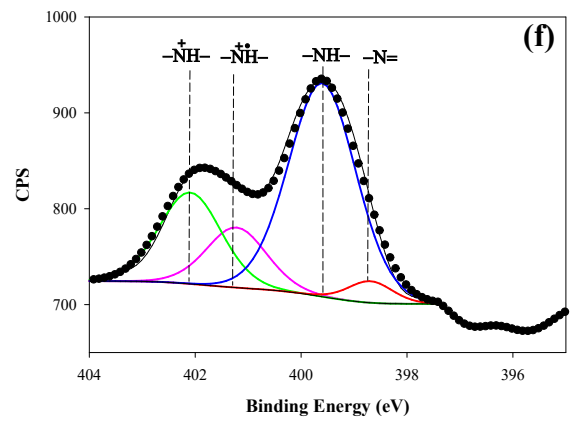

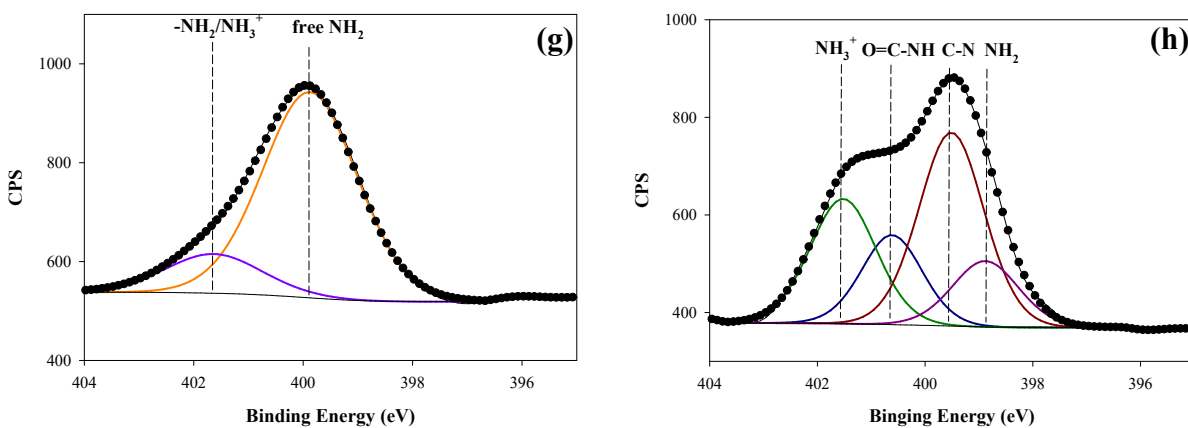

**Figure S3** High-resolution spectra of N 1s of (a) SPCE; (b) b-SPCE; (c) dPIn; (d) APTES/dPIn; (e) CHI-GOx/ APTES/dPIn; (f) 1.5% MWCNT-dPIn; (g) APTES/1.5% MWCNT-dPIn; and (h) CHI-GOx/1.5% MWCNT-dPIn.

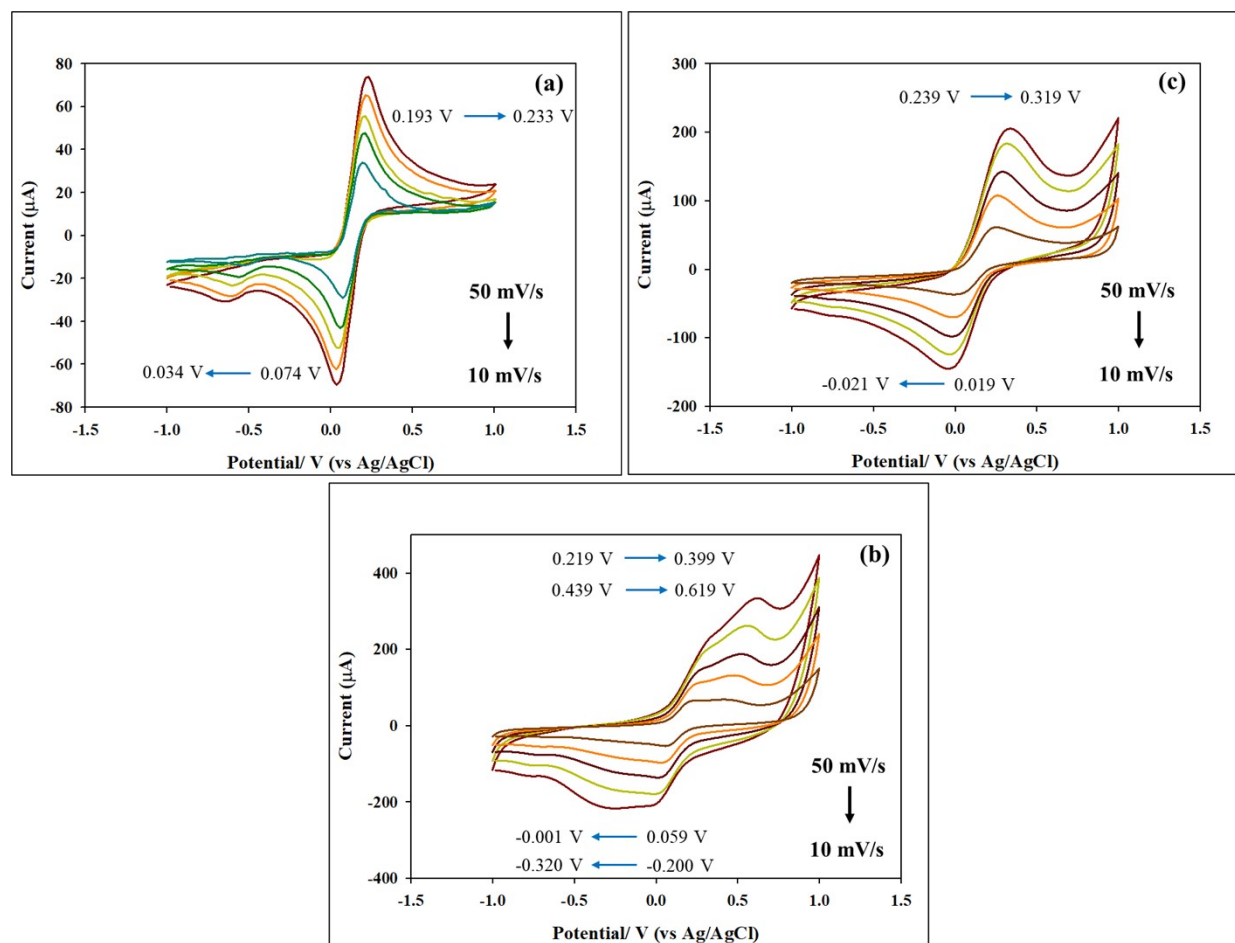

**Fig. S4** Cyclic voltammograms of the modified electrodes in a solution of 5 mM of  $K_3[Fe(CN)_6]/K_4[Fe(CN)_6]$  containing 0.1 M PBS solution (pH 7.4) and 0.1 M KCl: (a) SPCE; (b) dPIn; and (c) 1.5% MWCNT-dPIn.

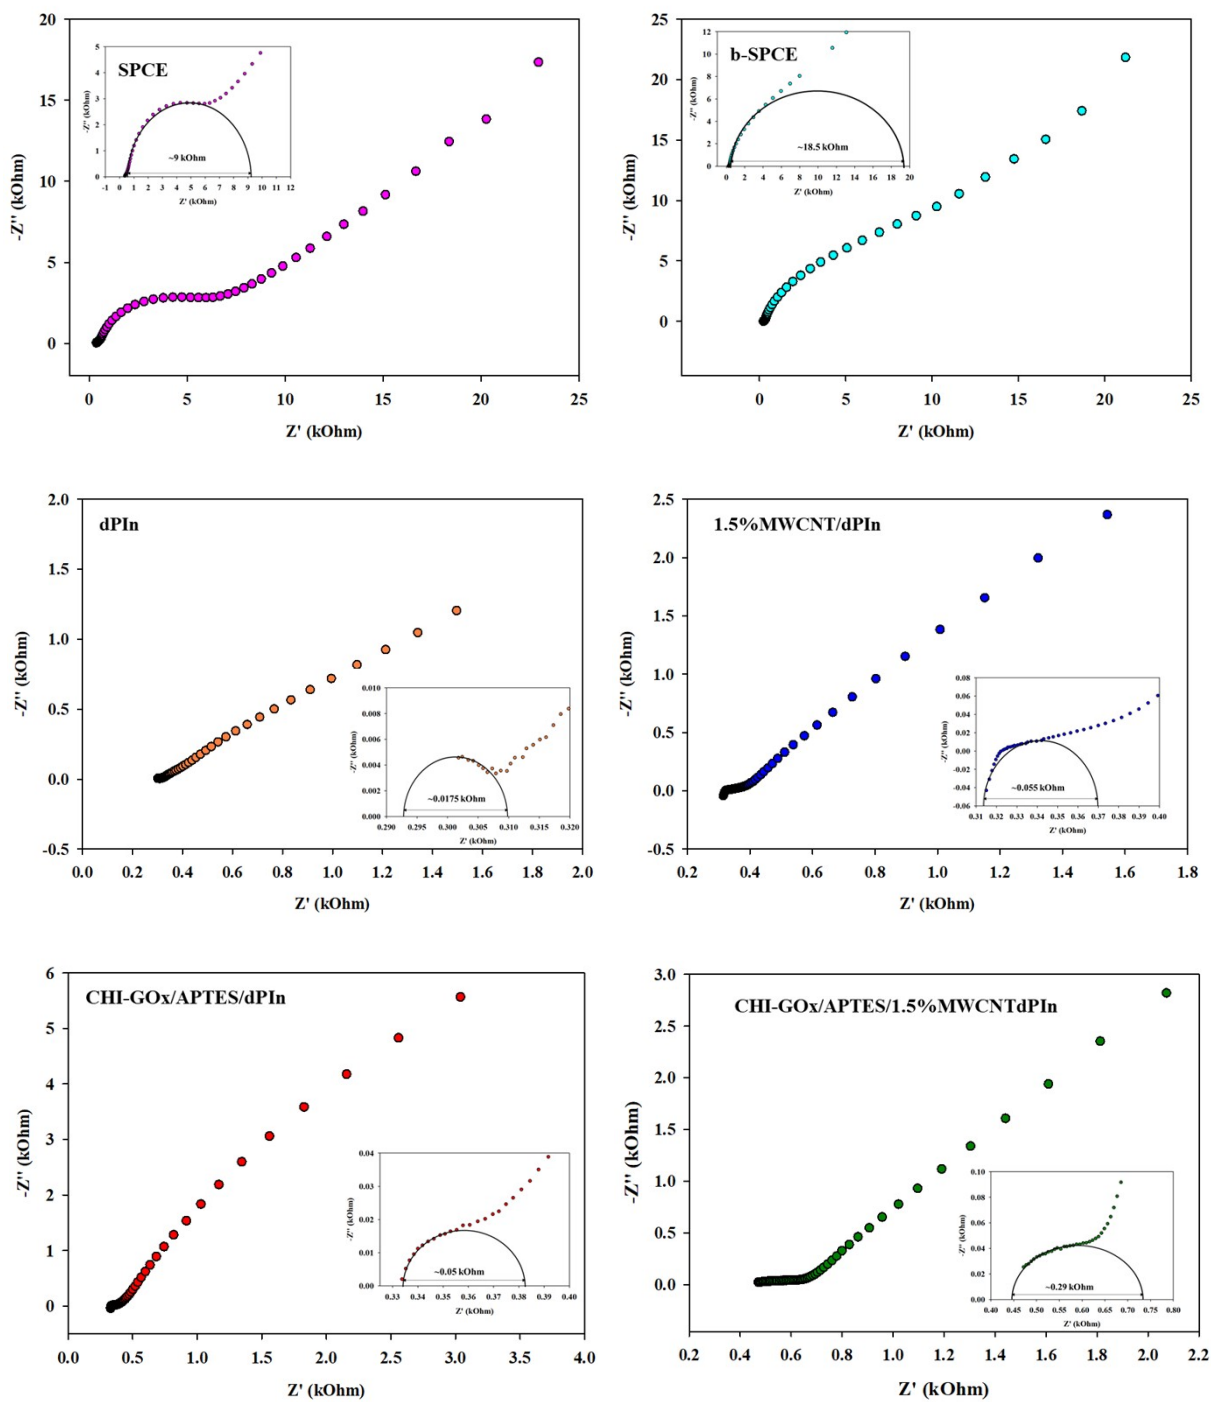

**Fig. S5** Nyquist plots of various modified electrodes in a solution of 5 mM of  $K_3[Fe(CN)_6]/K_4[Fe(CN)_6]$  containing 0.1 M PBS solution (pH 7.4) and 0.1 M KCl.

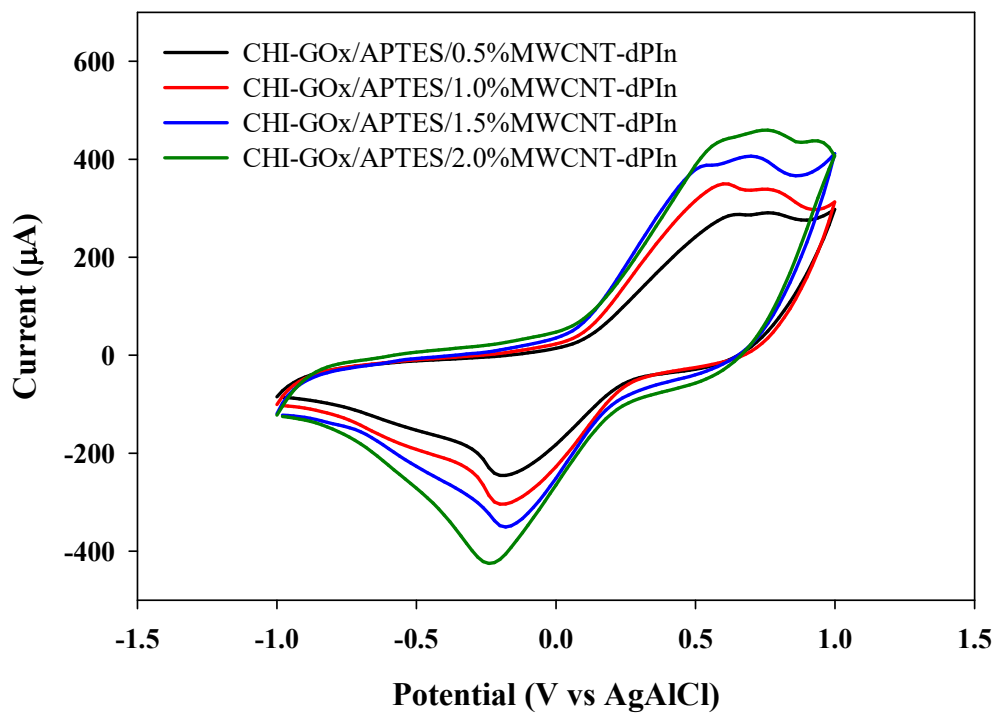

**Fig. S6** Cyclic voltammograms of CHI-GOx immobilized on various APTES/MWCNTs-dPIn electrodes in a solution of 5 mM of  $K_3[Fe(CN)_6]/K_4[Fe(CN)_6]$  containing 0.1 M PBS solution (pH 7.4) and 0.1 M KCl.

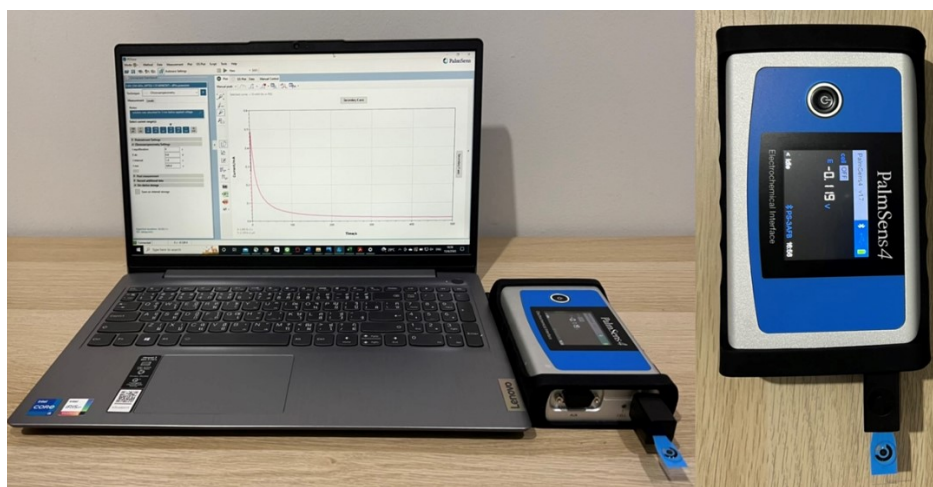

**Fig. S7** Experimental setup of the portable enzymatic glucose sensor by chronoamperometric detection in glucose solution by PalmSens4 device connected with the modified electrode and linked to a laptop computer via Bluetooth or USB connector.

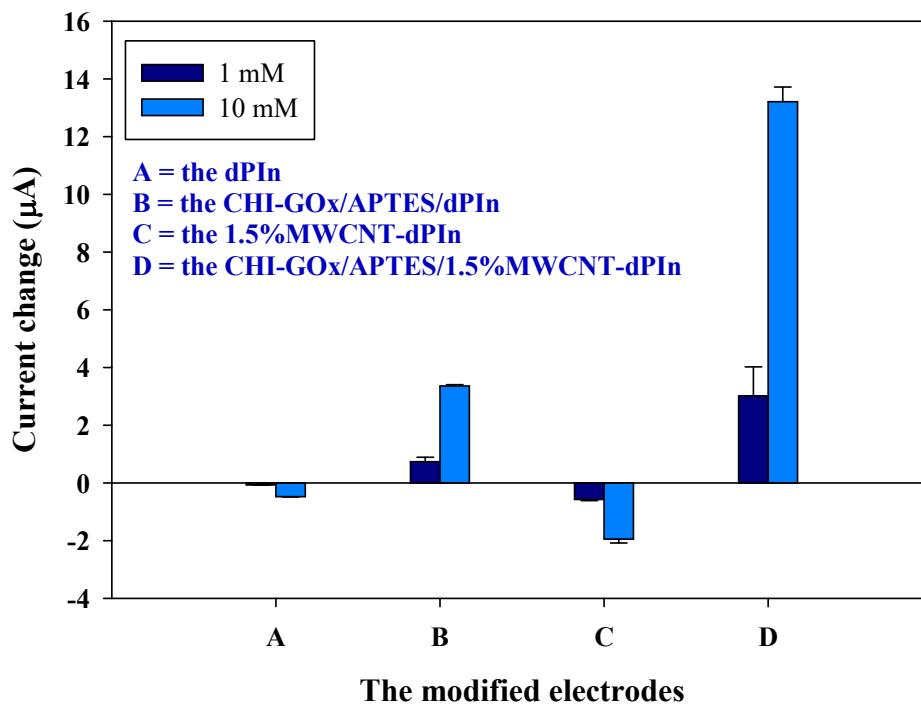

**Fig. S8** Current changes ( $\Delta I = I_{\text{glc}} - I_{\text{PBS}}$ ) at +0.6 V vs. Ag/AgCl in 1 mM and 10 mM glucose solutions of various modified electrodes.

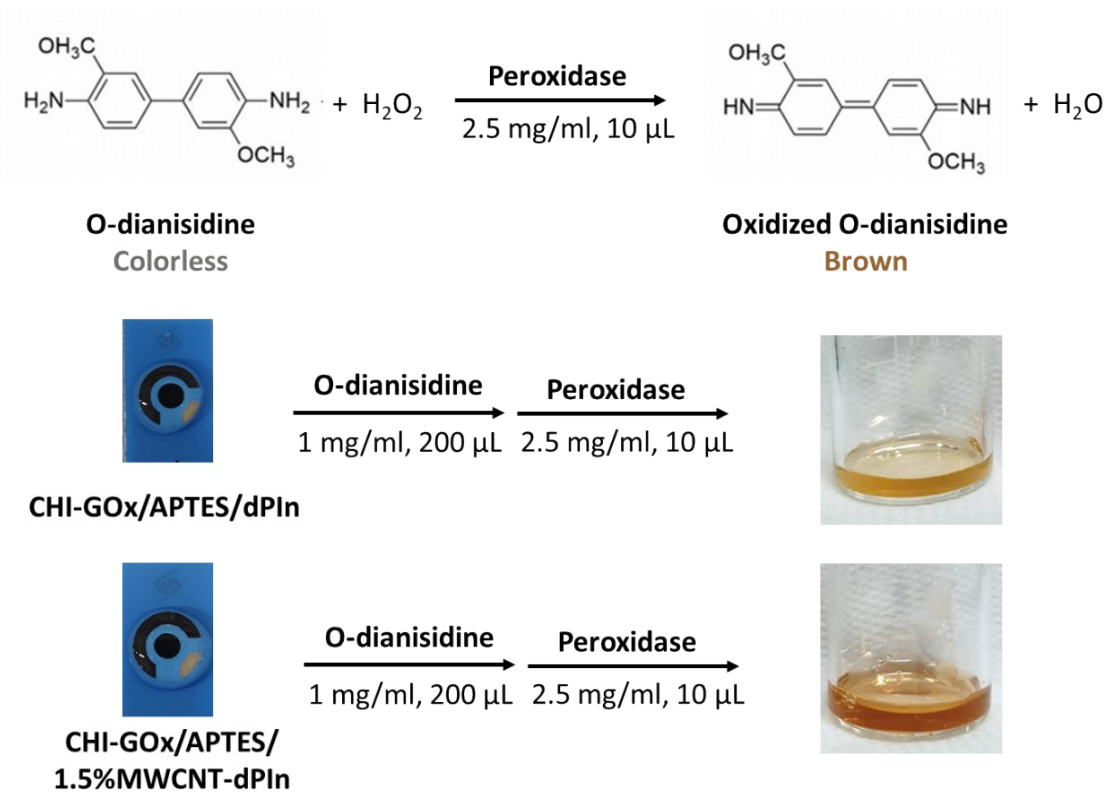

**Fig. S9** Determination of H<sub>2</sub>O<sub>2</sub> produced in glucose oxidation of the fabricated glucose sensors.

First, 200  $\mu\text{L}$  of 1 mM glucose solution was dropped on the modified electrodes, CHI-GOx/APTES/dPIn and CHI-GOx/APTES/1.5%MWCNT-dPIn, the reaction time was 10 min. Then, the glucose solution reacted with 200  $\mu\text{L}$  of o-dianisidine (1 mg/ml in 1 mL ethanol:49 mL 0.1 M PBS). Finally, 10  $\mu\text{L}$  of the enzyme peroxidase (2.5 mg/ml) in 0.1 M PBS was dropped into the mixture solution. The color of the mixture solution suddenly changed from colorless to brown as shown in **Fig. S6**. This result confirms that  $\text{H}_2\text{O}_2$  was generated by the interaction of glucose and GOx.

### Calculations of sensitivity for CHI-GOx/APTES/dPIn and CHI-GOx/APTES/1.5%MWCNT- dPIn

- 1) The power law equation of the CHI-GOx/APTES/dPIn is  $y = 0.8312x^{0.5251}$ ,  $r^2 = 0.9805$ , where y is the current change ( $\Delta I$ ) and x is the glucose concentration.

Thus, the power law equation is  $\Delta I = 0.8312C^{0.5251}$

$$\Delta I = 0.8312 \cdot C^{0.5251}$$

$$\frac{d(\Delta I)}{dC} = \frac{0.8312 dC^{0.5251}}{dC}$$

$$\frac{d(\Delta I)}{dC} = 0.8312 \cdot 0.5251 C^{(0.5251-1)}$$

$$\text{At LOD, } C = 0.01 \text{ mM, } \frac{d(\Delta I)}{dC} = 3.9 \mu\text{A/mM}$$

The sensitivity was calculated from the slope (3.9  $\mu\text{A/mM}$ ) divided by the geometric surface area (0.07  $\text{cm}^2$ ). Thus, the sensitivity of the glucose sensor based on CHI-GOx/APTES/dPIn is 55.7  $\mu\text{A/mM} \cdot \text{cm}^2$ .

- 2) The power law equation of the CHI-GOx/APTES/1.5%MWCNT- dPIn is  $y = 3.0722x^{0.5667}$ ,  $r^2 = 0.9927$ , where y is the current change ( $\Delta I$ ) and x is the glucose concentration.

Thus, the power law equation is  $\Delta I = 3.0722C^{0.5667}$

$$\Delta I = 3.0722 \cdot C^{0.5667}$$



$$\frac{d(\Delta I)}{dC} = \frac{3.0722 dC^{0.5667}}{dC}$$

$$\frac{d(\Delta I)}{dC} = 3.0722 \cdot 0.5667 C^{(0.5667-1)}$$

$$\text{At LOD, } C = 0.01 \text{ mM, } \frac{d(\Delta I)}{dC} = 12.8 \text{ } \mu\text{A/mM}$$

The sensitivity was calculated from the slope (12.8  $\mu\text{A/mM}$ ) divided by the geometric surface area (0.07  $\text{cm}^2$ ). Thus, the sensitivity of the glucose sensor based on CHI-GOx/APTES/1.5%MWCNT- dPIn is 182.9  $\mu\text{A/mM} \cdot \text{cm}^2$ .
